# Supplementary material for: Asymmetric multifunctional 3D cell microenvironments by capillary force assembly
Source: Royal Society of Chemistry journal article supplement (doi:10.1039/c9tb00653b), 2019-01-01
Supplement: c9tb00653b1.pdf [file c9tb00653b1.pdf]

# Asymmetric Multifunctional 3D Cell Microenvironments by Capillary Force Assembly

*Qimeng Song, Sergey I. Druzhinin, Holger Schönherr\**

Physical Chemistry I and Research Center of Micro and Nanochemistry and Engineering  
(C $\mu$ ), Department of Chemistry and Biology, University of Siegen, Adolf-Reichwein-Str. 2,  
57076, Siegen, Germany.

## Supporting Information

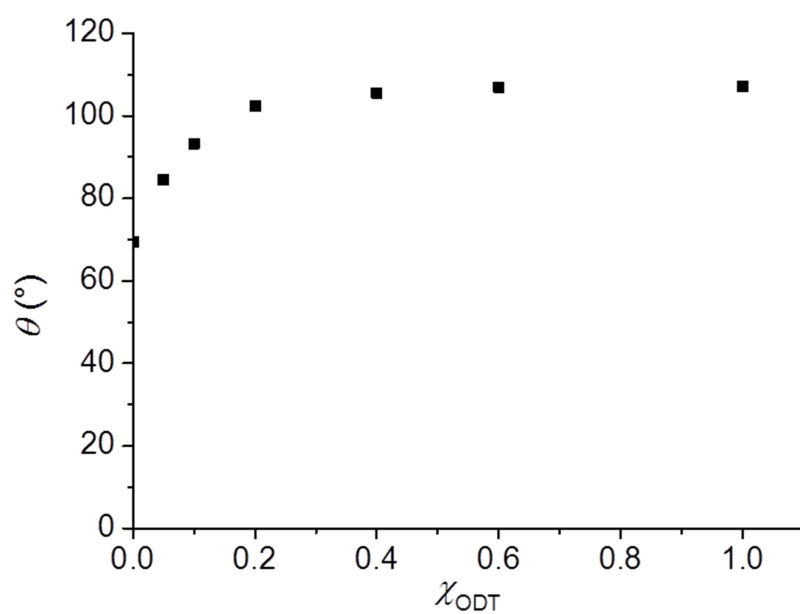

**Figure S1.** Static water contact angle of the SAM-functionalized gold surface as function of ODT fraction in the (ODT/MUBiB) binary thiol solution. Each point is the mean value of more than 6 different positions.

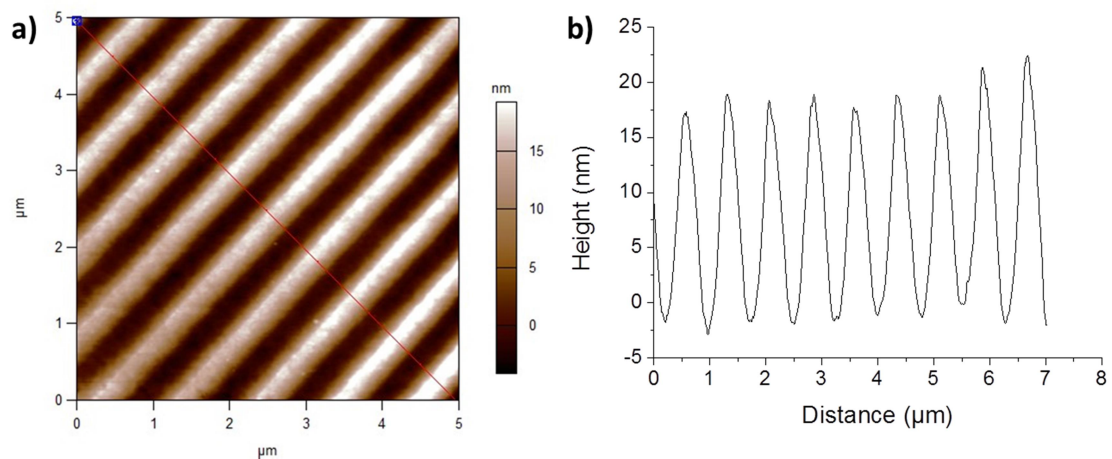

**Figure S2.** a) AFM height images of nanoline pattern in top of a micro/nanostructured PS cube. b) Height profile of the line pattern from panel a) along the red line. The pitch of the lines is  $750 \pm 28$  nm and the depth is  $21 \pm 2$  nm).

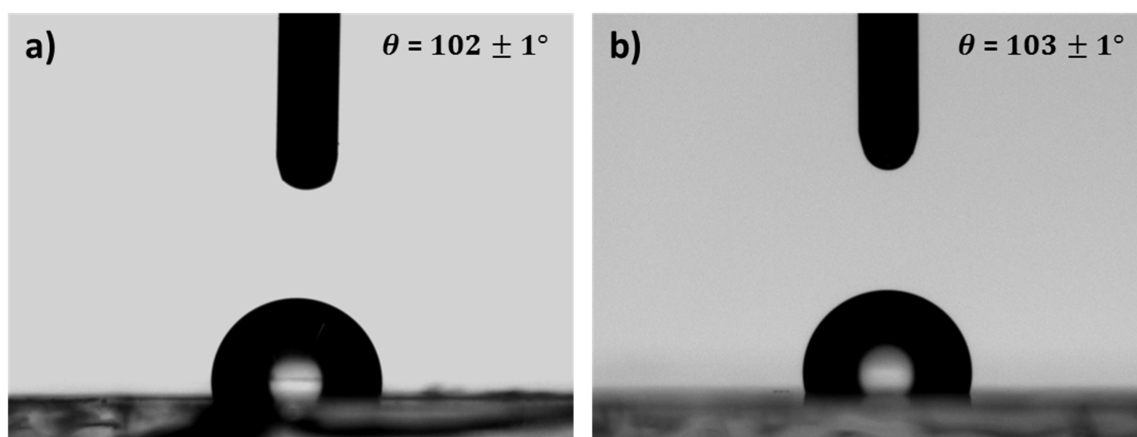

**Figure S3.** Measurement of static water contact angle of a 2  $\mu\text{L}$  water droplet on a) polystyrene surface after imprint with a featureless flat PDMS stamp; b) nanoline patterned (the pitch of the lines is  $750 \pm 28$  nm) PS film surface. The value of the contact angle is the mean value of more than 6 different positions.

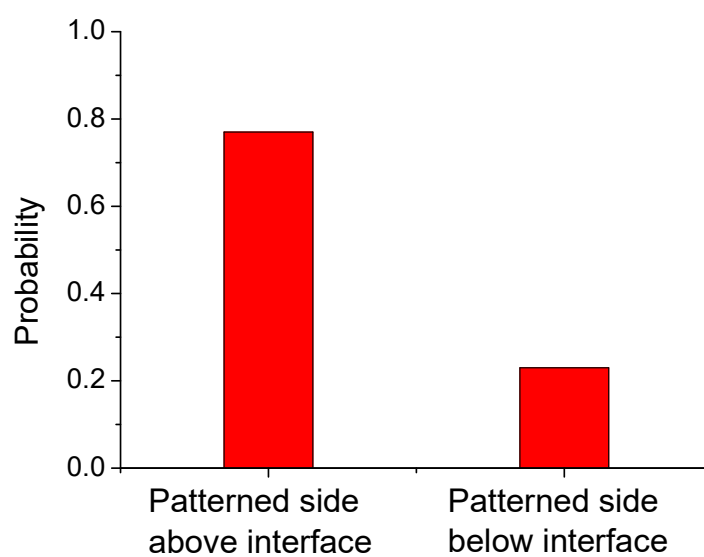

**Figure S4.** Statistical analysis of cube orientation: The location of the nanoline pattern above or below the water/air interface was observed in self-assembled aggregates by analyzing the SEM images of transferred cube aggregates. More than 500 cubes were analyzed.

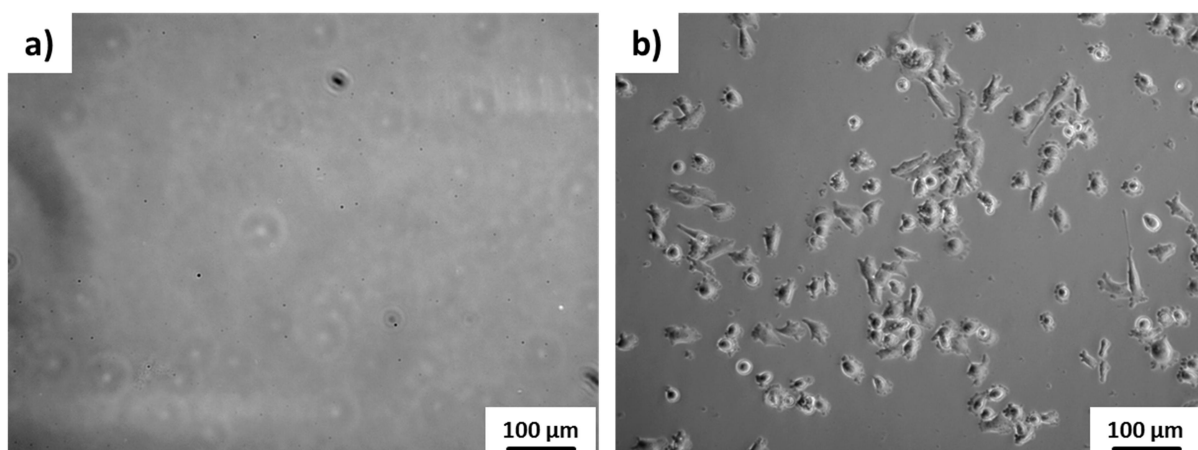

**Figure S5.** Light microscopy images of Patu 8988T cells on different substrates after 24 h incubation: a) PAAm brushes on transparent flat Au substrate(~30 nm) and b) TCPS.

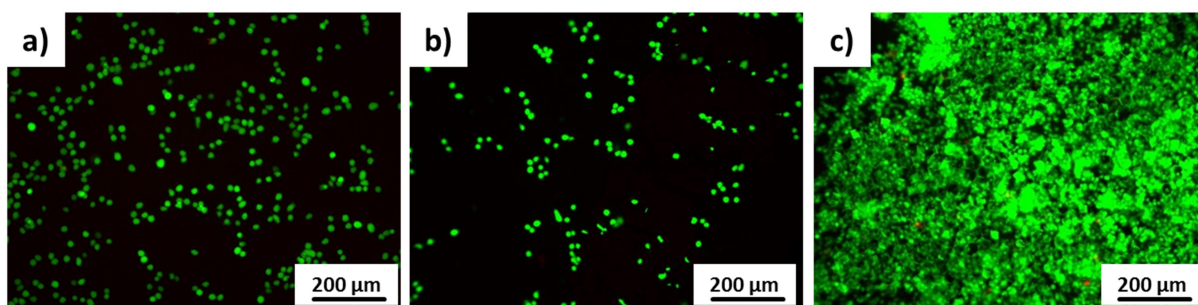

**Figure S6.** Fluorescence microscopy images of Patu 8988T cells after life/dead staining with propidium iodide (red; dead cells) and fluorescein diacetate (green; viable cells) on different substrates: a) TCPS (after 24 h incubation) and (b,c) glass substrate supported microwells formed by self-assembled of hydrophobized PS cubes b) after 24 h and c) after 72 h cell incubation.

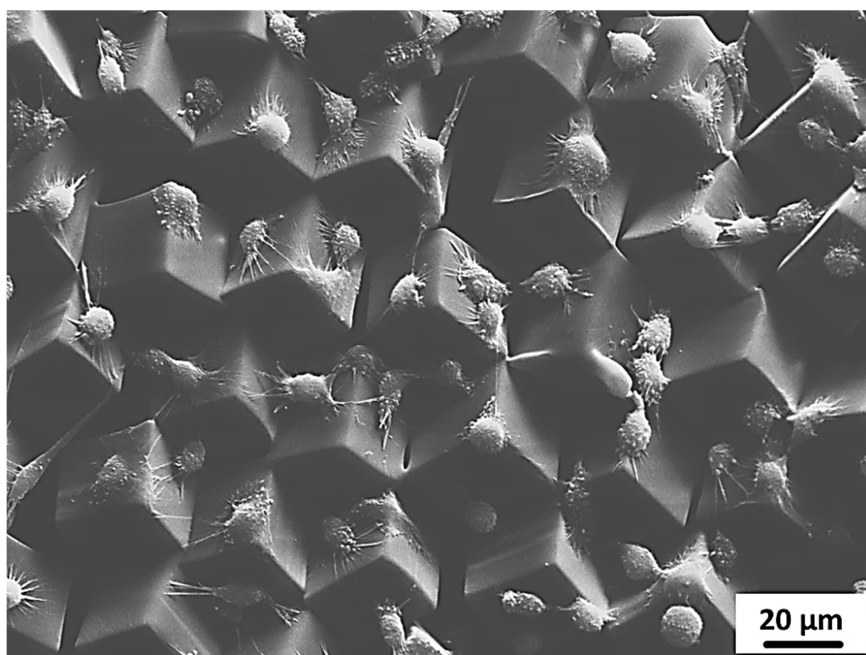

**Figure S7.** SEM image of of Patu 8988T cells attached inside of FN functionalized MHDA modified microwells after 24 h cell incubation.
